# Supplementary material for: Withania somnifera Extracts Promote Resilience against Age-Related and Stress-Induced Behavioral Phenotypes in Drosophila melanogaster; a Possible Role of Other Compounds besides Withanolides
Source: MDPI journal article supplement (doi:10.3390/nu14193923), 2022-09-22
Supplement: s1 [file s1]

## Supplementary material

| BEN-WSAq-9                       | 0.5 mg/g |       |         |       | 2 mg/g  |       |         |        | 5 mg/g  |        |         |        |
|----------------------------------|----------|-------|---------|-------|---------|-------|---------|--------|---------|--------|---------|--------|
|                                  | Day 0    |       | Day 7   |       | Day 0   |       | Day 7   |        | Day 0   |        | Day 7   |        |
|                                  | Mean     | SEM   | Mean    | SEM   | Mean    | SEM   | Mean    | SEM    | Mean    | SEM    | Mean    | SEM    |
| Withanolide B (ng/g)             | ND       |       | ND      |       | 3.09    | 0.19  | 4.33    | 0.17   | 11.47   | 0.46   | 14.69   | 0.41   |
| Withanolide A (ng/g)             | 714.87   | 44.44 | 1008.31 | 31.82 | 2557.44 | 99.25 | 3216.62 | 100.49 | 7264.65 | 262.11 | 8898.27 | 314.25 |
| 12-Deoxywithastramonolide (ng/g) | 31.58    | 2.85  | 41.20   | 1.51  | 108.44  | 3.76  | 133.20  | 3.50   | 299.71  | 11.35  | 357.40  | 16.80  |
| Withaferin A (ng/g)              | 7.20     | 2.08  | 5.22    | 0.43  | 31.09   | 10.67 | 9.29    | 0.64   | 27.60   | 6.49   | 22.00   | 1.89   |
| Withanone (ng/g)                 | 514.69   | 26.25 | 721.00  | 16.59 | 1877.76 | 42.25 | 2358.51 | 39.21  | 5213.87 | 143.34 | 6588.02 | 147.77 |
| Withanoside V (ng/g)             | 34.71    | 4.59  | 47.51   | 0.87  | 126.04  | 3.54  | 166.51  | 2.92   | 392.78  | 14.42  | 436.73  | 12.65  |
| Withanoside IV (ng/g)            | 109.11   | 9.80  | 146.42  | 4.54  | 412.87  | 11.65 | 514.27  | 10.22  | 1196.11 | 47.18  | 1387.78 | 38.66  |

**Table S1.** Measurement of phytochemical markers in *Drosophila* food supplemented with WSAq-9. WS phytochemical marker levels (ng/g) in food at the day of preparation (day 0) and when kept for 7 days at 25°C were measured. Food samples from three different preparations were analyzed for each concentration and day.

| BEN-WSE-2                        | 0.5 mg/g |        |         |        |
|----------------------------------|----------|--------|---------|--------|
|                                  | Day 0    |        | Day 7   |        |
|                                  | Mean     | SEM    | Mean    | SEM    |
| Withanolide B (ng/g)             | 4.60     | 0.44   | 7.93    | 0.23   |
| Withanolide A (ng/g)             | 3447.93  | 210.26 | 4830.63 | 308.72 |
| 12-Deoxywithastramonolide (ng/g) | 90.83    | 5.82   | 121.17  | 5.19   |
| Withaferin A (ng/g)              | 54.33    | 18.01  | 24.70   | 3.56   |
| Withanone (ng/g)                 | 2826.63  | 128.33 | 4018.33 | 199.89 |
| Withanoside V (ng/g)             | 220.77   | 13.37  | 309.40  | 4.34   |
| Withanoside IV (ng/g)            | 651.20   | 39.31  | 938.90  | 9.61   |

**Table S2.** Measurement of phytochemical markers in *Drosophila* food supplemented with WSE-2. WS phytochemical marker levels (ng/g) in food at the day of preparation (day 0) and when kept for 7 days at 25°C were measured. Food samples from three different preparations were analyzed for each day.

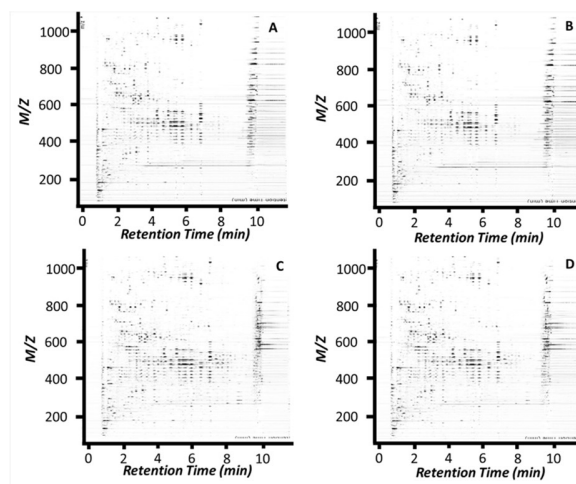

**Figure S1.** LC-HRMS (ESI+) fingerprints A) WSAq2, B) WSAq9, C) WSE2 and D) WSE5. LC-HRMS fingerprints were acquired for digital archiving of extracts to accompany voucher samples.

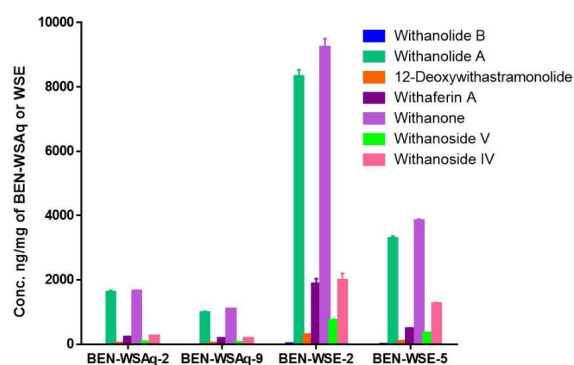

**Figure S2.** Levels of WS phytochemical markers (ng/mg of extract powder) measured in WSAq and WSE using LC-MRM-MS (as described under 2.3.1.). Analysis was performed in triplicate (N=3); mean  $\pm$  STD

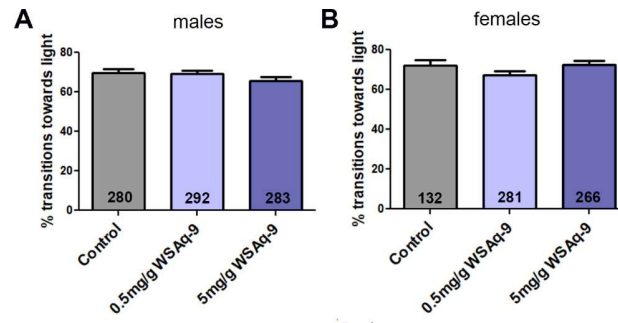

**Figure S3.** Treatment with WSAq-9 had no effect in young flies. Feeding flies after eclosion for 14d with 0.5mg/g or 5mg/g of WSE-2 before testing did not affect the phototaxis performance of males (A) or females (B). Kruskal-Wallis ANOVA with built-in Bonferroni post-hoc was used for statistical analyses. The number of tested flies is given in the bars.

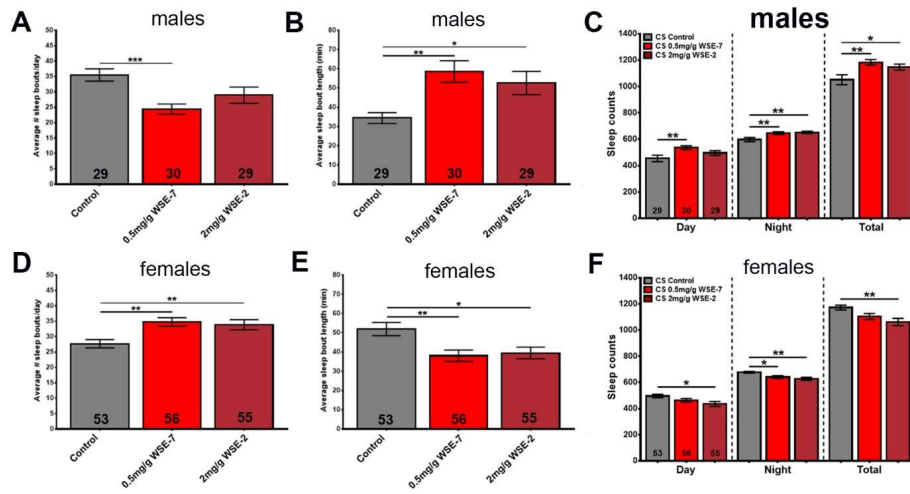

**Figure S4.** Continuous feeding of WSE-2 improves sleep in males but not in females. Males show a reduction in sleep bout number that is significant with 0.5mg/g WSE-2 (A). This is accompanied by a significant increase in sleep bout length at both concentrations (0.5mg/g and 2mg/g, B). WSE-2 treatment also increases nighttime sleep and total daily time spent asleep (C). Females do show an increase in sleep bout number (D) and a decrease in sleep bout length at both concentrations of WSE-2 (E). Both concentrations decrease nighttime sleep and total time spent asleep (F). A one-way ANOVA with Dunnett's multiple comparisons test was used and the number of analyzed flies is given in the bars. \*  $p < 0.05$ , \*\*  $p < 0.01$  compared to controls on regular food.
